# Supplementary material
Source: publisher figshare collection journal article supplement (https://gsajournals.figshare.com/ndownloader/files/22441334)
Supplement: Supplementary file 1 [file 22441334]

**SUPPLEMENTAL LEGENDS**

**Supplementary Table 1. Number of individuals in each BMI category, by sex.**

**Supplementary Table 2. Mean and standard deviation for all 17 traits in male subjects grouped by BMI and WC categories.**

**Supplementary Table 3. Mean and standard deviation for all 17 traits in female subjects grouped by BMI and WC categories.**

**Supplementary Table 4. Genetic (upper triangle) and residual (lower triangle) covariance estimates (± standard error) between all 17 traits, estimated by using bivariate model analysis.**

**Supplementary Figure 1. Distribution of the sex- and age-adjusted z-scores for each trait.**
